# Supplementary material
Source: PubMed Central journal article supplement (PMC4270586)
Supplement: ijcep0007-8118-f1.pdf [file ijcep0007-8118-f1.pdf]

## TLRs signaling pathway genes polymorphisms and bladder cancer risk

**Table S1.** Candidate genes in the SNPs selection flow

| Gene Full Name                                                                      | Gene ID |
|-------------------------------------------------------------------------------------|---------|
| similar to calmodulin 3 (phosphorylase kinase, delta) (H. sapiens)                  | 147908  |
| similar to calmodulin 2                                                             | 124827  |
| cytochrome c, somatic pseudogene 35                                                 | 121916  |
| toll-interleukin 1 receptor (TIR) domain containing adaptor protein                 | 114609  |
| toll-like receptor 10                                                               | 81793   |
| toll interacting protein                                                            | 54472   |
| toll-like receptor 9                                                                | 54106   |
| ECSIT homolog (Drosophila)                                                          | 51295   |
| toll-like receptor 7                                                                | 51284   |
| lymphocyte antigen 96                                                               | 23643   |
| mitogen-activated protein kinase kinase kinase 7 interacting protein 2              | 23118   |
| mitogen-activated protein kinase kinase kinase 7 interacting protein 1              | 10454   |
| toll-like receptor 6                                                                | 10333   |
| ribosomal protein S6 kinase, 90kDa, polypeptide 5                                   | 9252    |
| mitogen-activated protein kinase kinase kinase 14                                   | 9020    |
| peptidoglycan recognition protein 1                                                 | 8993    |
| Fas (TNFRSF6) -associated via death domain                                          | 8772    |
| receptor (TNFRSF) -interacting serine-threonine kinase 1                            | 8737    |
| TNFRSF1A-associated via death domain                                                | 8717    |
| MAP kinase interacting serine/threonine kinase 1                                    | 8569    |
| inhibitor of kappa light polypeptide gene enhancer in B-cells, kinase gamma         | 8517    |
| TNF receptor-associated factor 6                                                    | 7189    |
| tumor necrosis factor receptor superfamily, member 1B                               | 7133    |
| tumor necrosis factor receptor superfamily, member 1A                               | 7132    |
| tumor necrosis factor, alpha-induced protein 3                                      | 7128    |
| tumor necrosis factor (TNF superfamily, member 2)                                   | 7124    |
| toll-like receptor 4                                                                | 7099    |
| toll-like receptor 3                                                                | 7098    |
| toll-like receptor 2                                                                | 7097    |
| mitogen-activated protein kinase kinase kinase 7                                    | 6885    |
| signal transducer and activator of transcription 3 (acute-phase response factor)    | 6774    |
| v-src sarcoma (Schmidt-Ruppin A-2) viral oncogene homolog (avian)                   | 6714    |
| son of sevenless homolog 1 (Drosophila)                                             | 6654    |
| SHC (Src homology 2 domain containing) transforming protein 1                       | 6464    |
| mitogen-activated protein kinase kinase 4                                           | 6416    |
| ribosomal protein S6 kinase, 90kDa, polypeptide 4                                   | 6195    |
| v-rel reticuloendotheliosis viral oncogene homolog A, nuclear factor of kappa light | 5970    |
| polypeptide gene enhancer in B-cells 3, p65 (avian)                                 |         |
| v-raf-1 murine leukemia viral oncogene homolog 1                                    | 5894    |
| protein tyrosine phosphatase, receptor type, R                                      | 5801    |
| eukaryotic translation initiation factor 2-alpha kinase 2                           | 5610    |
| mitogen-activated protein kinase kinase 6                                           | 5608    |
| mitogen-activated protein kinase kinase 3                                           | 5606    |
| mitogen-activated protein kinase kinase 2                                           | 5605    |
| mitogen-activated protein kinase kinase 1                                           | 5604    |
| mitogen-activated protein kinase 8                                                  | 5599    |
| mitogen-activated protein kinase 3                                                  | 5595    |

## TLRs signaling pathway genes polymorphisms and bladder cancer risk

|                                                                                                    |      |
|----------------------------------------------------------------------------------------------------|------|
| mitogen-activated protein kinase 1                                                                 | 5594 |
| protein kinase C, beta 1                                                                           | 5579 |
| protein kinase C, alpha                                                                            | 5578 |
| protein kinase, cAMP-dependent, regulatory, type II, beta                                          | 5577 |
| protein kinase, cAMP-dependent, regulatory, type II, alpha                                         | 5576 |
| protein kinase, cAMP-dependent, regulatory, type I, beta                                           | 5575 |
| protein kinase, cAMP-dependent, regulatory, type I, alpha (tissue specific extinguisher 1)         | 5573 |
| protein kinase, cAMP-dependent, catalytic, gamma                                                   | 5568 |
| protein kinase, cAMP-dependent, catalytic, beta                                                    | 5567 |
| protein phosphatase 3 (formerly 2B), catalytic subunit, gamma isoform                              | 5533 |
| protein phosphatase 3 (formerly 2B), catalytic subunit, beta isoform                               | 5532 |
| protein phosphatase 3 (formerly 2B), catalytic subunit, alpha isoform                              | 5530 |
| protein phosphatase 2 (formerly 2A), catalytic subunit, alpha isoform                              | 5515 |
| peroxisome proliferator-activated receptor alpha                                                   | 5465 |
| platelet-derived growth factor receptor, alpha polypeptide                                         | 5156 |
| nitric oxide synthase 1 (neuronal)                                                                 | 4842 |
| nerve growth factor receptor (TNFR superfamily, member 16)                                         | 4804 |
| nerve growth factor, beta polypeptide                                                              | 4803 |
| nuclear factor of kappa light polypeptide gene enhancer in B-cells inhibitor, alpha                | 4792 |
| nuclear factor of kappa light polypeptide gene enhancer in B-cells 1 (p105)                        | 4790 |
| myeloid differentiation primary response gene (88)                                                 | 4615 |
| v-myc myelocytomatosis viral oncogene homolog (avian)                                              | 4609 |
| mitogen-activated protein kinase kinase 1                                                          | 4214 |
| jun oncogene                                                                                       | 3725 |
| integrin, beta 1 (fibronectin receptor, beta polypeptide, antigen CD29 includes MDF2, MSK12)       | 3688 |
| interleukin-1 receptor-associated kinase 1                                                         | 3654 |
| interleukin 1 receptor, type I                                                                     | 3554 |
| interleukin 1, alpha                                                                               | 3552 |
| inhibitor of kappa light polypeptide gene enhancer in B-cells, kinase beta                         | 3551 |
| inhibitor of kappa light polypeptide gene enhancer in B-cells, kinase beta                         | 3551 |
| insulin-like growth factor 1 receptor                                                              | 3480 |
| v-Ha-ras Harvey rat sarcoma viral oncogene homolog                                                 | 3265 |
| glutamate receptor, ionotropic, N-methyl D-aspartate 2D                                            | 2906 |
| glutamate receptor, ionotropic, N-methyl D-aspartate 2C                                            | 2905 |
| glutamate receptor, ionotropic, N-methyl D-aspartate 2B                                            | 2904 |
| glutamate receptor, ionotropic, N-methyl D-aspartate 2A                                            | 2903 |
| glutamate receptor, ionotropic, N-methyl D-aspartate 1                                             | 2902 |
| growth factor receptor-bound protein 2                                                             | 2885 |
| MAP kinase interacting serine/threonine kinase 2                                                   | 2872 |
| guanine nucleotide binding protein (G protein), gamma transducing activity polypeptide 1           | 2792 |
| guanine nucleotide binding protein (G protein), beta polypeptide 1                                 | 2782 |
| GNAS complex locus                                                                                 | 2778 |
| v-fos FBJ murine osteosarcoma viral oncogene homolog                                               | 2353 |
| ELK1, member of ETS oncogene family                                                                | 2002 |
| ELK1, member of ETS oncogene family                                                                | 2002 |
| epidermal growth factor receptor (erythroblastic leukemia viral (v-erb-b) oncogene homolog, avian) | 1956 |
| discs, large homolog 4 (Drosophila)                                                                | 1742 |
| mitogen-activated protein kinase 14                                                                | 1432 |
| conserved helix-loop-helix ubiquitous kinase                                                       | 1147 |

## TLRs signaling pathway genes polymorphisms and bladder cancer risk

|                                            |     |
|--------------------------------------------|-----|
| CD14 molecule                              | 929 |
| calmodulin 3 (phosphorylase kinase, delta) | 808 |
| calmodulin 2 (phosphorylase kinase, delta) | 805 |
| calmodulin 1 (phosphorylase kinase, delta) | 801 |

---

**Table S2.** MiRNAs associated with TLRs signaling pathway genes

|             |             |            |
|-------------|-------------|------------|
| miR-939     | miR-520a-5p | miR-202    |
| miR-920     | miR-519-e   | miR-194    |
| miR-768     | miR-515-5p  | miR-19     |
| miR-653     | miR-509-3p  | miR-186    |
| miR-646     | miR-505     | miR-185    |
| miR-644     | miR-499b    | miR-185-5p |
| miR-635     | miR-499a    | miR-181d   |
| miR-633b    | miR-491-5p  | miR-181c   |
| miR-632     | miR-483-3p  | miR-181b   |
| miR-626     | miR-455-3p  | miR-181a   |
| miR-626     | miR-452     | miR-147    |
| miR-608     | miR-433     | miR-145    |
| miR-607     | miR-381     | miR-143    |
| miR-593     | miR-370     | miR-138    |
| miR-587     | miR-37      | miR-138    |
| miR-584d-5p | miR-34a     | miR-1323   |
| miR-584c-5p | miR-342-3p  | miR-130b   |
| miR-584b-5p | miR-340     | miR-1298   |
| miR-584a-5p | miR-340     | miR-1297   |
| miR-559     | miR-30b     | miR-1294   |
| miR-548f    | miR-302d    | miR-1288   |
| miR-548e    | miR-302C    | miR-1274a  |
| miR-548b-3p | miR-302b    | miR-1271   |
| miR-548-3p  | miR-300     | miR-1256   |
| miR-548     | miR-297     | miR-1237   |
| miR-548     | miR-297     | miR-1228   |
| miR-541     | miR-26b     | miR-1201   |
| miR-539     | miR-26a     | miR-615-5p |
| miR-520q    | miR-207-3p  | let-7f-2   |
| miR-520h    | miR-205     | let-7b     |

---

## TLRs signaling pathway genes polymorphisms and bladder cancer risk

**Table S3.** Candidate SNPs in the SNPs selection flow

| Gene   | SNP         | Chromosome | Position  | Major/Minor Allele | Putative microRNAs                            |
|--------|-------------|------------|-----------|--------------------|-----------------------------------------------|
| CD14   | rs3776138   | 5          | 140011321 | C/G                | hsa-miR-302b, hsa-miR-302d                    |
| IRAK1  | rs11556423  | X          | 152929358 | G/T                | hsa-miR-587                                   |
| IRAK1  | rs3027901   | X          | 153277280 | A/G                | hsa-miR-488-5p                                |
| MAP3K7 | rs2131906   | 6          | 91282763  | A/G                | hsa-miR-297, hsa-miR-548e, hsa-miR-548f       |
| MAP3K7 | rs9451441   | 6          | 91282764  | A/T                | hsa-miR-297                                   |
| MAP3K7 | rs3734657   | 6          | 91282929  | C/T                | hsa-miR-194, hsa-miR-212, hsa-miR-132         |
| MAP3K7 | rs34631230  | 6          | 91226286  | C/T                | hsa-miR-138                                   |
| MAPK1  | rs3810611   | 22         | 22115553  | A/G                | hsa-miR-138-5p                                |
| MAPK1  | rs58437134  | 22         | 22117065  | A/G                | hsa-miR-5581-3p                               |
| MAPK1  | rs61757989  | 22         | 22112868  | G/A                | hsa-miR-632                                   |
| MAPK1  | rs2276008   | 22         | 21759747  | C/G                | hsa-miR-300, hsa-miR-381-3p, hsa-miR-624-3p   |
| MAPK1  | rs2276007   | 22         | 21759742  | C/T                | hsa-miR-300                                   |
| MAPK1  | rs1803546   | 22         | 21764121  | G/T                | hsa-miR-1323                                  |
| MAPK1  | rs1048752   | 22         | 21764144  | A/G                | hsa-miR-520h                                  |
| MAPK14 | rs1803337   | 6          | 36185978  | C/T                | hsa-miR-539                                   |
| MAPK14 | rs8510      | 6          | 36186158  | C/T                | hsa-miR-541                                   |
| MAPK14 | rs1803334   | 6          | 36109525  | C/T                | hsa-miR-6758-5p, hsa-miR-6856-5p              |
| MAPK3  | rs11865228  | 16         | 30033161  | G/T                | hsa-miR-143                                   |
| MAPK3  | rs3751867   | 16         | 30033353  | G/A                | hsa-miR-491-5p                                |
| MAPK3  | rs113204102 | 16         | 30128114  | G/C                | hsa-miR-608                                   |
| MAPK3  | rs1062543   | 16         | 30114441  | C/T                | hsa-miR-520a-5p, hsa-miR-1323                 |
| MAPK3  | rs41280866  | 16         | 30114549  | A/G                | hsa-miR-491-5p, hsa-miR-185-5p                |
| MAPK3  | rs41280860  | 16         | 30114536  | A/G                | hsa-miR-491-5p, hsa-miR-185-5p                |
| MAPK3  | rs41280864  | 16         | 30114548  | A/G                | hsa-miR-491-5p                                |
| MYD88  | rs6853      | 3          | 38184370  | G/A                | hsa-miR-143                                   |
| TAB2   | rs35859918  | 6          | 149731659 | C/A                | hsa-miR-124-3p, hsa-miR-3714, hsa-miR-506-3p  |
| TAB2   | rs34532338  | 6          | 149731141 | A/C                | hsa-miR-302c                                  |
| TLR4   | rs1057313   | 9          | 119517680 | G/T                | hsa-miR-202                                   |
| TLR4   | rs7869402   | 9          | 120478032 | C/T                | hsa-miR-539                                   |
| TLR6   | rs5743823   | 4          | 38828649  | T/C                | hsa-miR-452                                   |
| TLR6   | rs5743829   | 4          | 38827455  | C/T                | hsa-miR-4436b-3p                              |
| TLR7   | rs10127190  | X          | 12816916  | T/A                | hsa-miR-19a, hsa-miR-19b                      |
| TLR7   | rs5743786   | X          | 12817917  | T/C                | hsa-miR-548a-3p, hsa-miR-548e, hsa-miR-548f   |
| TLR7   | rs80280330  | X          | 12907534  | A/C                | hsa-miR-147                                   |
| TLR7   | rs72552316  | X          | 12889591  | C/T                | hsa-miR-1265, hsa-miR-4764-5p, hsa-miR-541-5p |
| TNF    | rs3093667   | 6          | 31653746  | G/T                | hsa-miR-570                                   |
| TNF    | rs3093666   | 6          | 31545733  | C/T                | hsa-miR-4721, hsa-miR-4446-3p                 |
| TNF    | rs28501663  | 6          | 31545828  | G/T                | hsa-miR-150-5p                                |
| TOLLIP | rs41314515  | 11         | 1298137   | C/A                | hsa-miR-608                                   |
| TRAF6  | rs5030486   | 11         | 36509146  | A/G                | hsa-miR-138-5p                                |
| TRAF6  | rs11033658  | 11         | 36509510  | C/T                | hsa-miR-130b                                  |
| TRAF6  | rs56289909  | 11         | 36511067  | C/T                | hsa-miR-1237                                  |
